# Supplementary material
Source: PubMed Central journal article supplement (PMC2945302)
Supplement: NIHMS225939-supplement-2_si_002.pdf [file NIHMS225939-supplement-2_si_002.pdf]

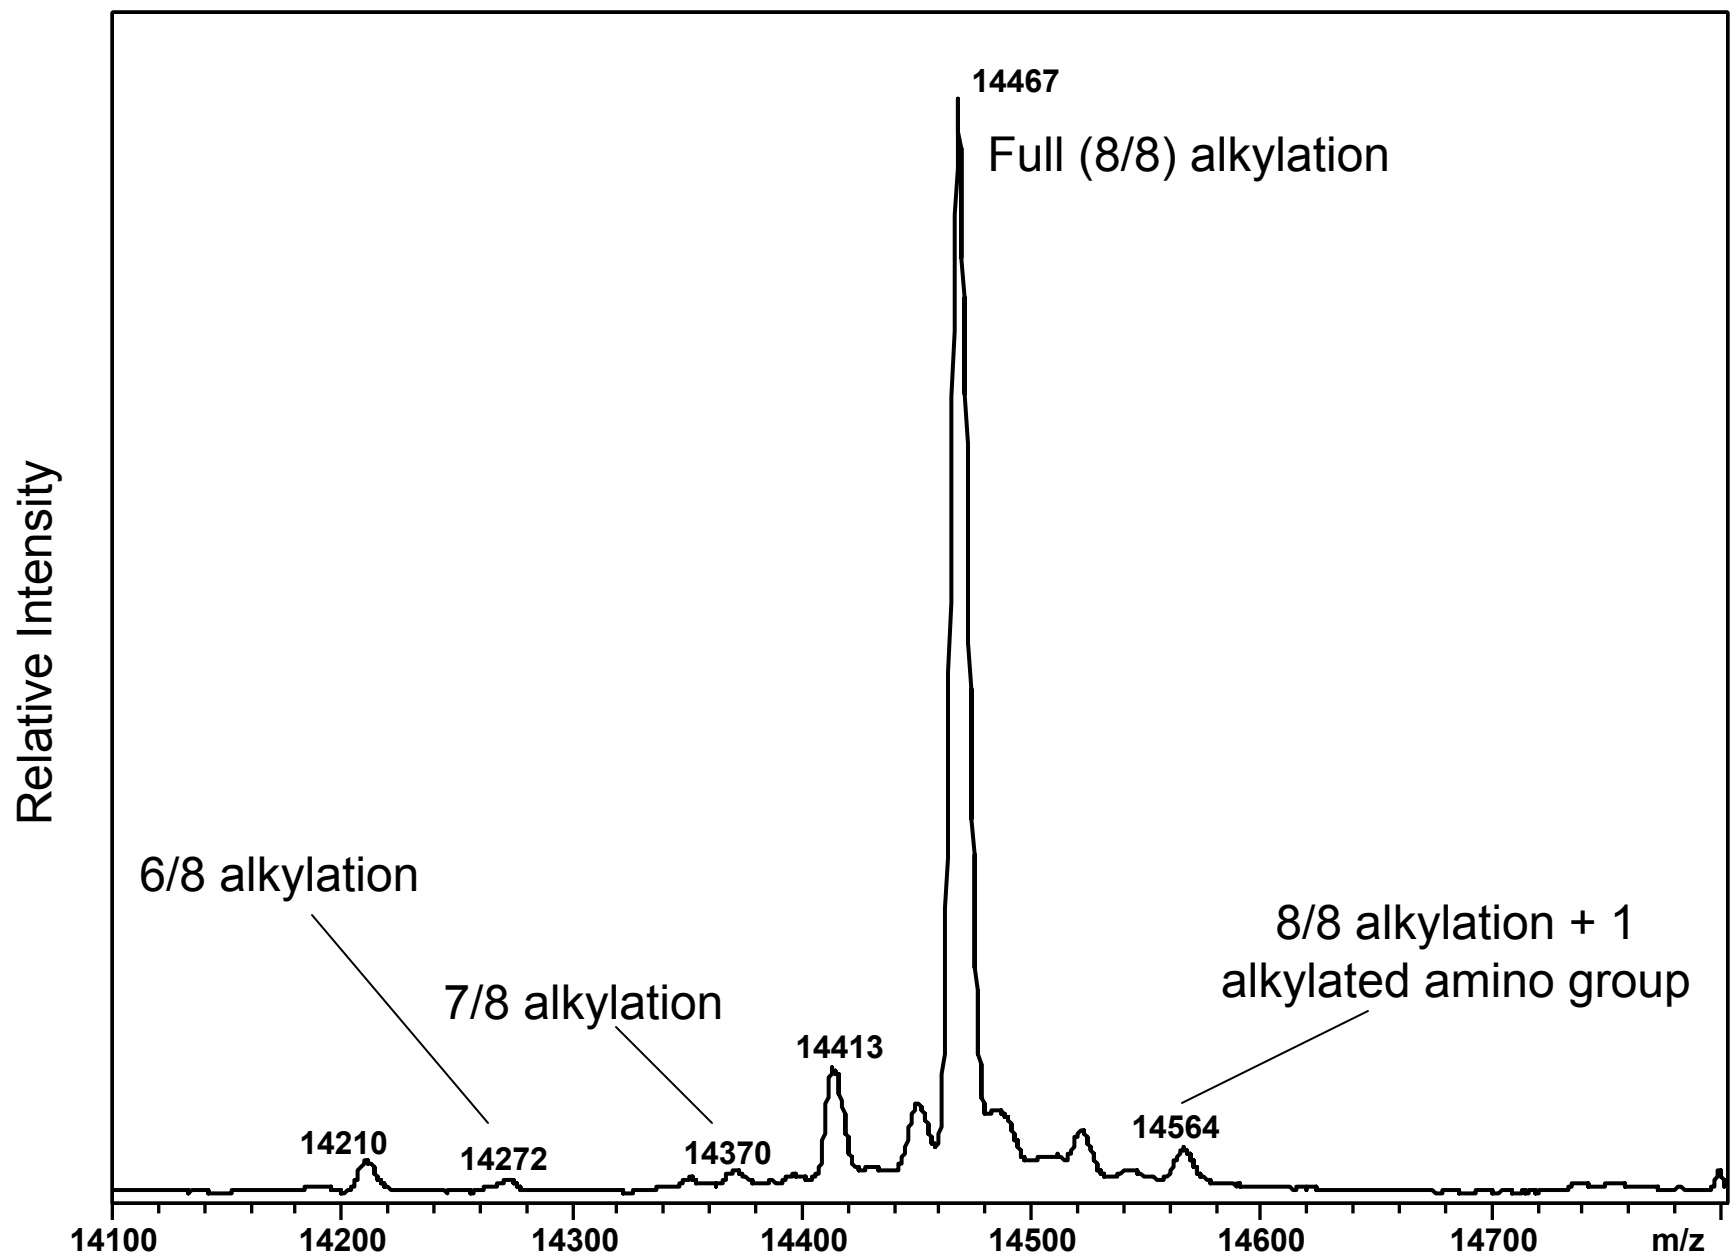

Supporting Information Figure S1

# 92-YPNC\*AYK-98

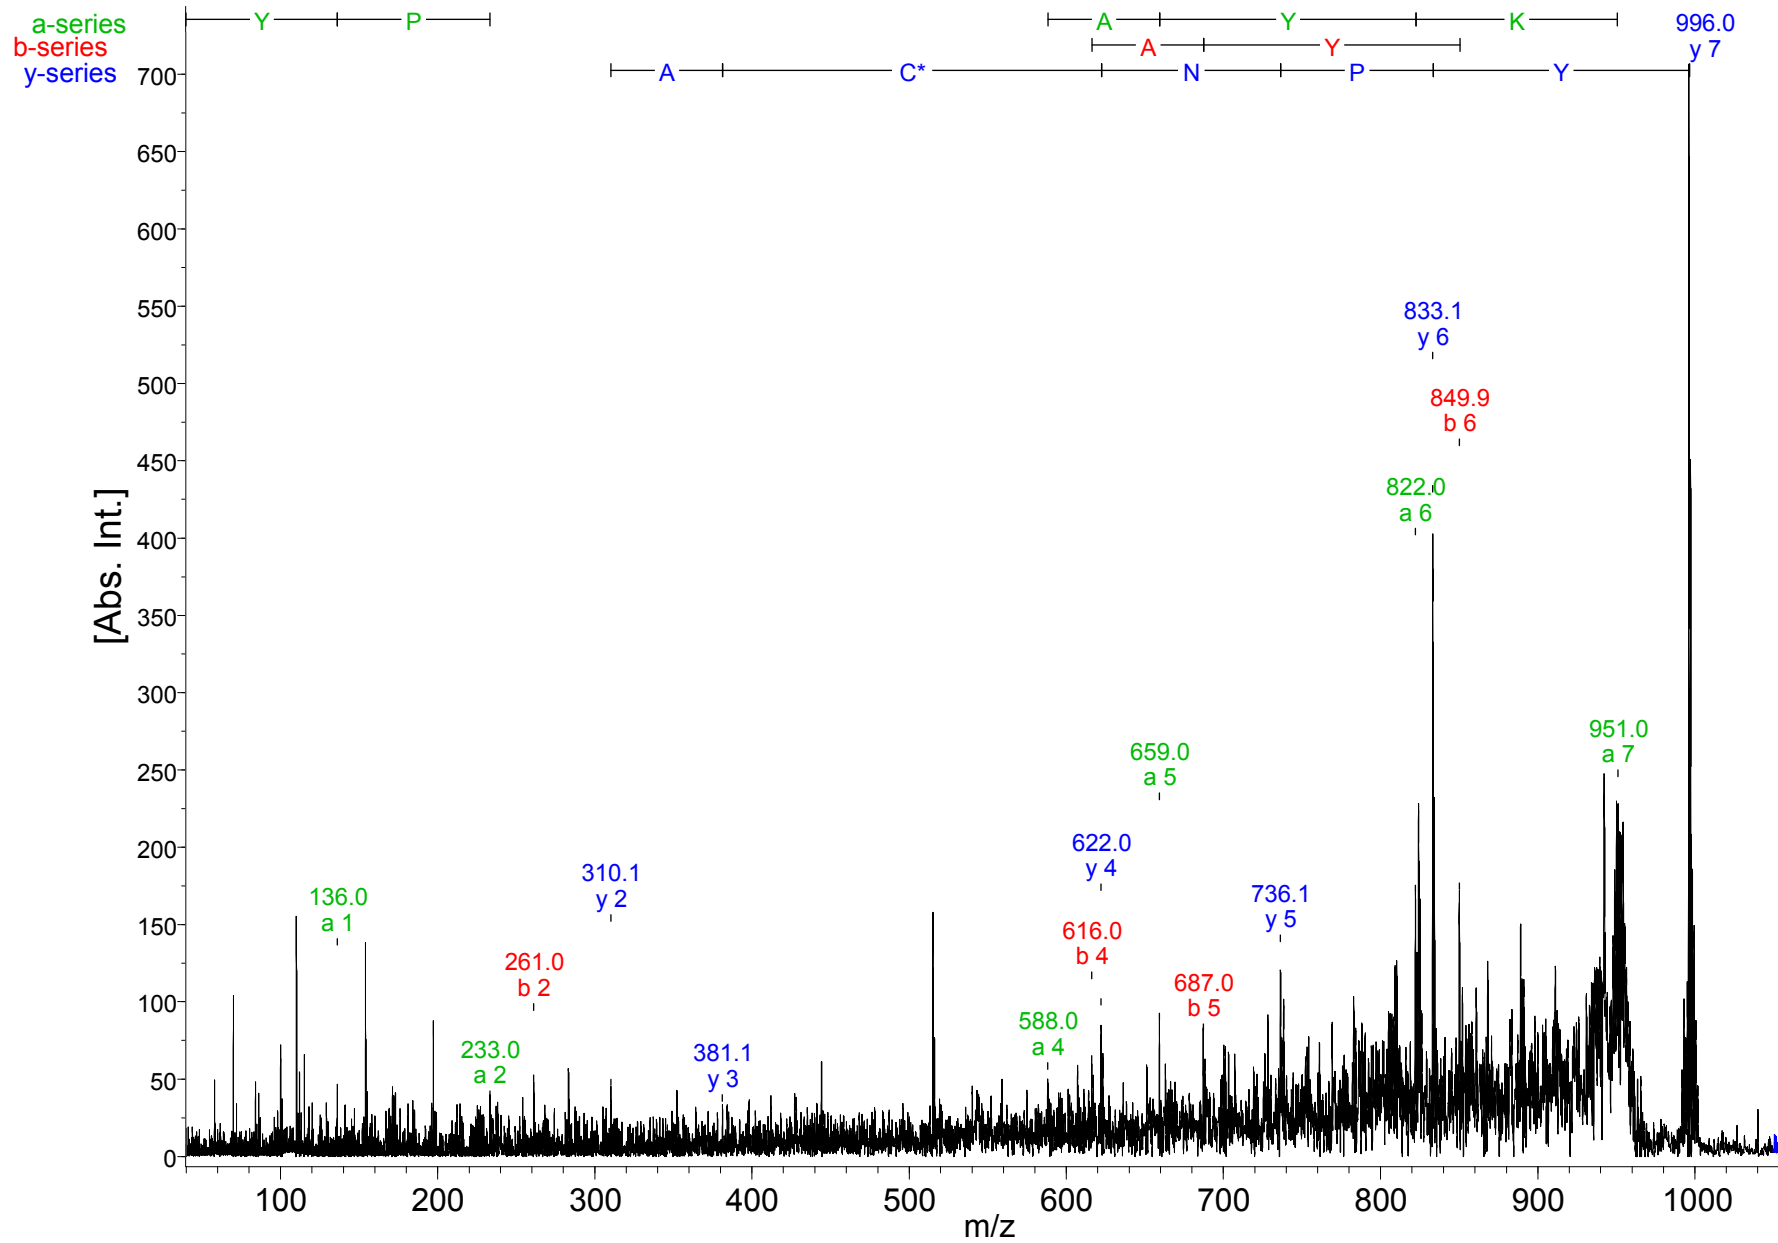

Supporting Information Figure S2a

# 8-FERQHMDSSSTAASSSNYC\*NQMMK-31

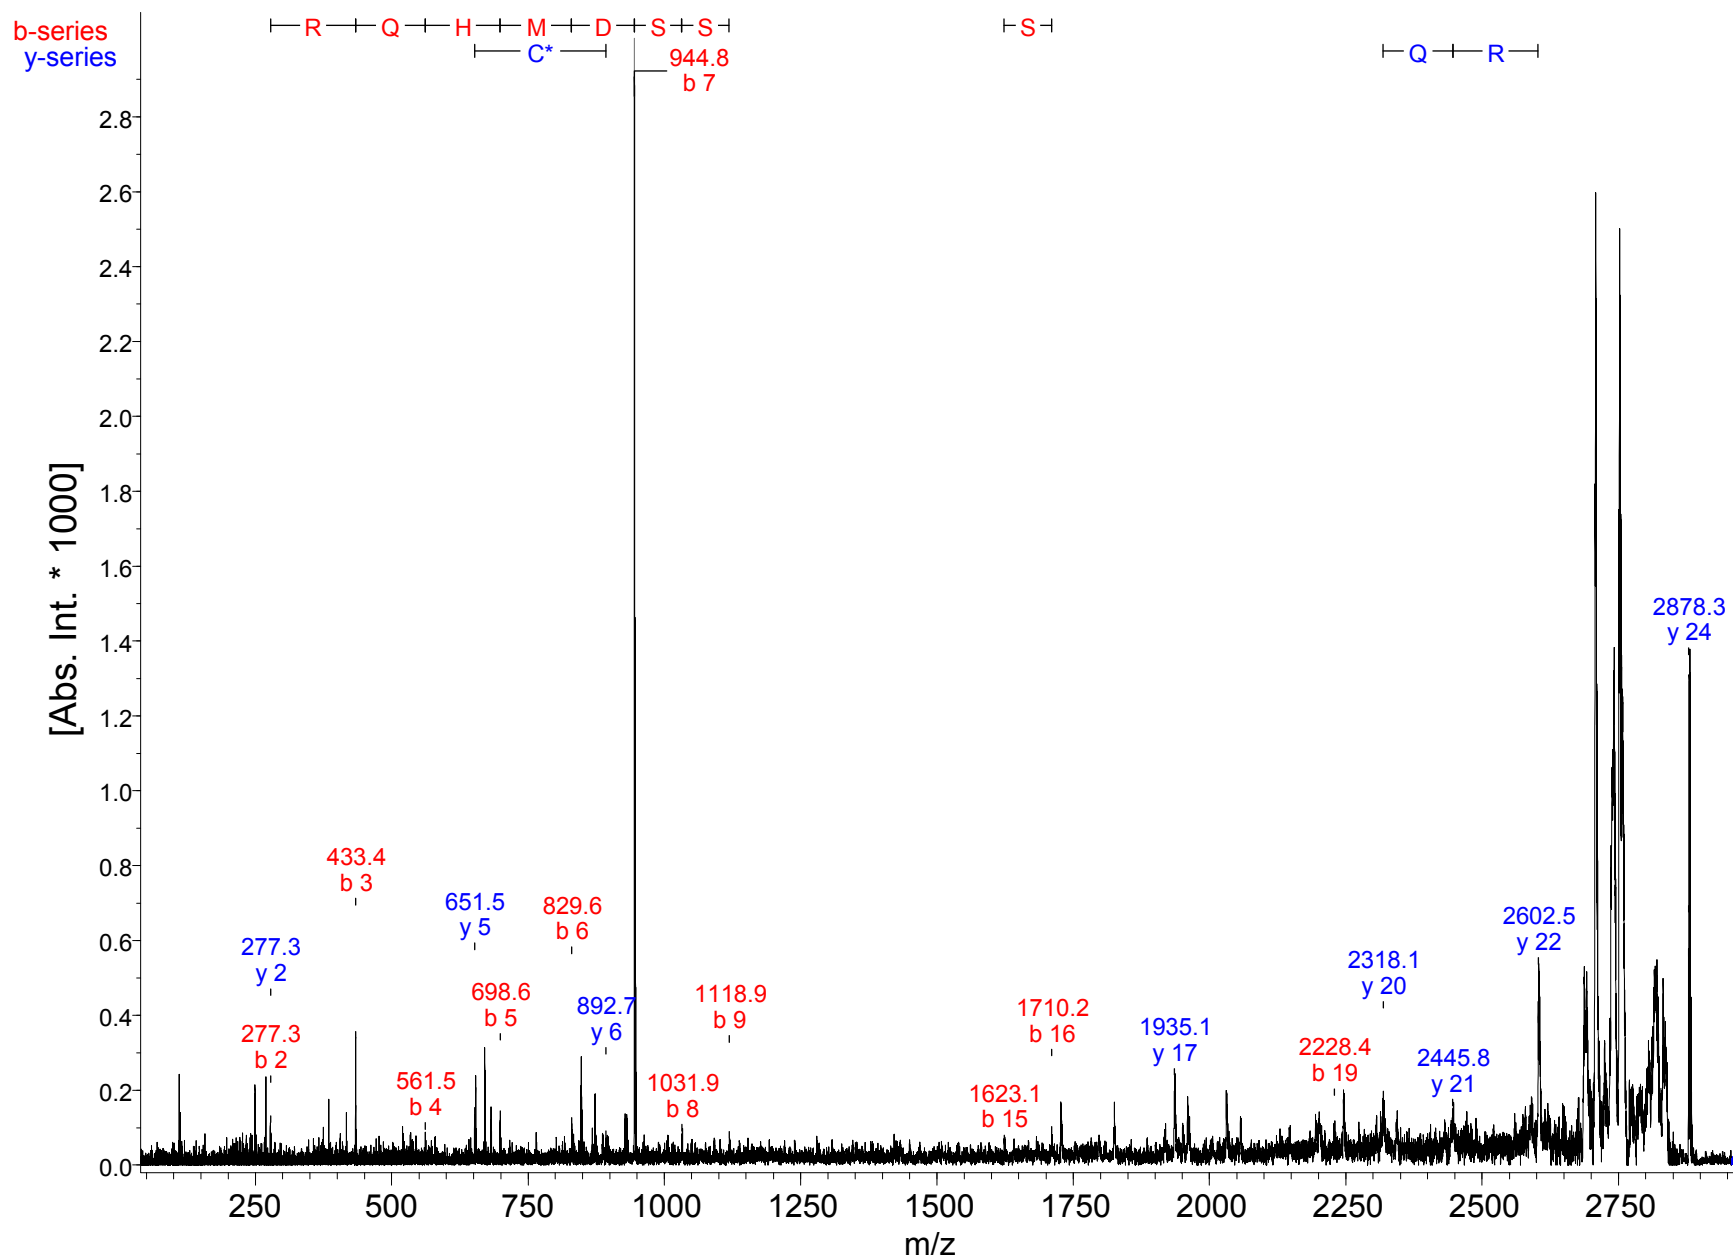

Supporting Information Figure S2b

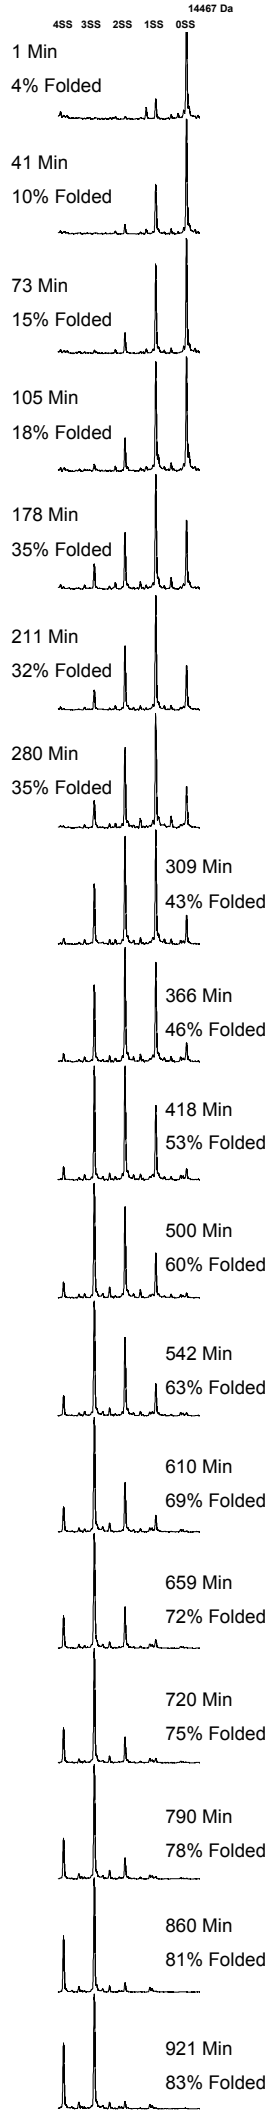

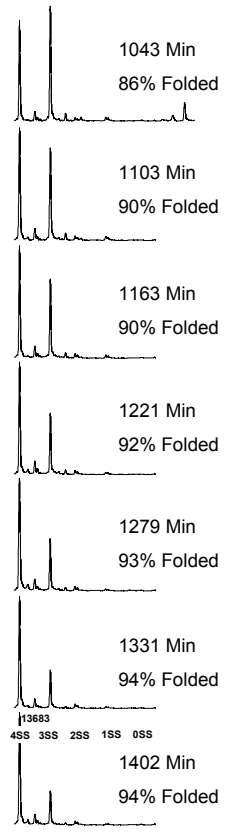

Supporting Information Figure S3
