# Supplementary material
Source: PubMed Central journal article supplement (PMC2945302)

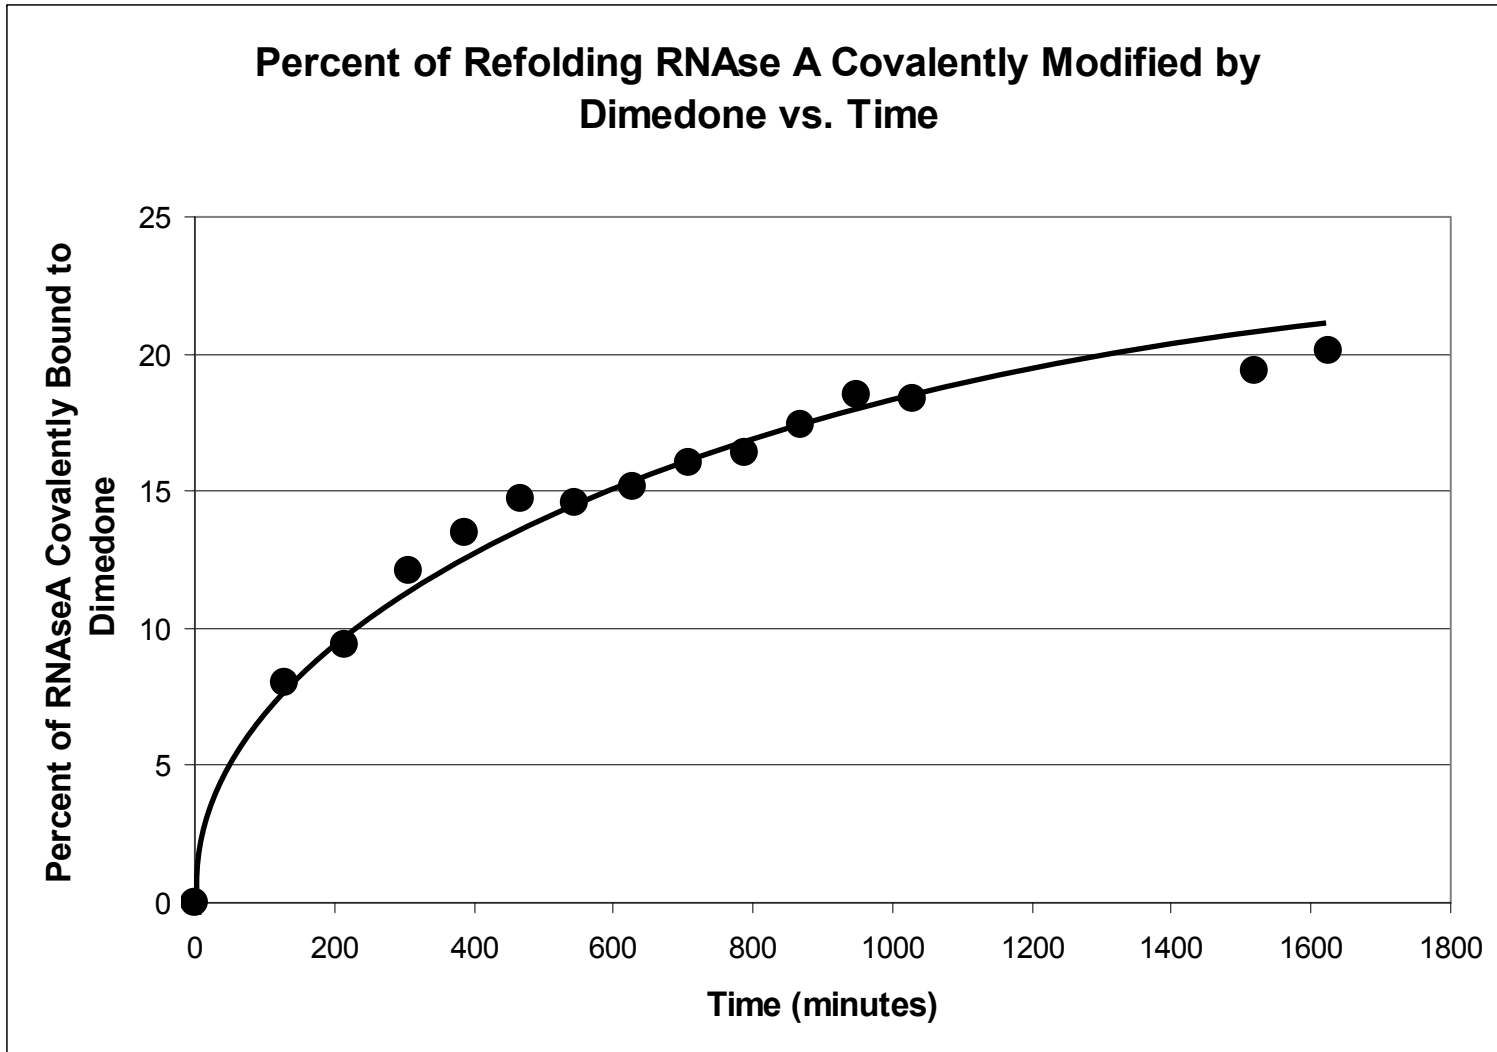

Supporting Information Figure S4

Supplement: NIHMS225939-supplement-1_si_001.pdf [file NIHMS225939-supplement-1_si_001.pdf]
